# Supplementary material for: Trace water affects tris(pentafluorophenyl)borane catalytic activity in the Piers–Rubinsztajn reaction
Source: Royal Society of Chemistry journal article supplement (doi:10.1039/c9dt02756d), 2019-01-01
Supplement: c9dt02756d1.pdf [file c9dt02756d1.pdf]

## Trace Water Affects Tris(pentafluorophenyl)borane Catalytic Activity in the Piers-Rubinsztajn Reaction

Alyssa F. Schneider,<sup>a</sup> Yang Chen<sup>a</sup> and Michael A. Brook<sup>\*a</sup>

### Supporting Information

Table S1 System Parameters used on the Karl-Fischer Titrator – measurement of trace water in B(C<sub>6</sub>F<sub>5</sub>)<sub>3</sub> solutions and PR reagent solutions (RS).

|                   | BCF    | RS     |                               | BCF      | RS       |
|-------------------|--------|--------|-------------------------------|----------|----------|
| Sample Parameters |        |        | Control Parameters            |          |          |
| Minimum (g)       | 0      | 0      | Current (μA)                  | 2        | 2        |
| Maximum (g)       | 2.000  | 5.000  | End Point (mV)                | 100      | 100      |
| Entry             | during | before | Generation speed              | fast     | Normal   |
| Mixing Parameters |        |        | Termination Parameters        |          |          |
| Speed (%)         | 40     | 40     | Max time (s)                  | 300      | 300      |
| Mix time (s)      | 10     | 15     | Drift stop                    | Relative | Relative |
| Auto Start        | No     | No     | Drift (μg min <sup>-1</sup> ) | 3        | 3        |

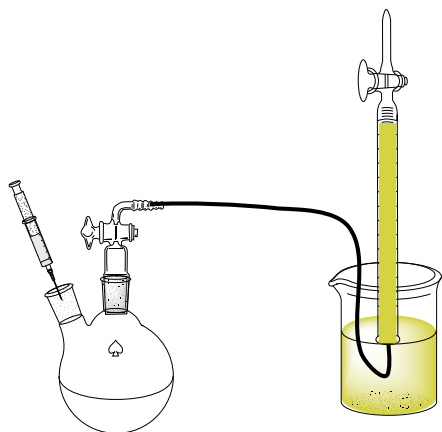

Figure S1 Apparatus to measure rate of gas evolution.

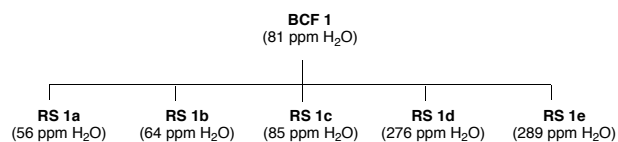

**Table 1**  
Figure S3

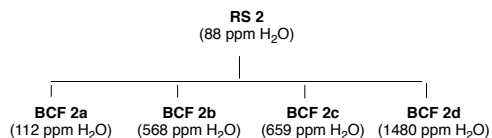

**Table 2**  
Figure 5  
(Sigma-Aldrich BCF)

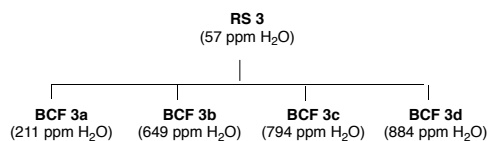

**Table 2**  
Figure 5  
(Alfa-Aesar BCF)

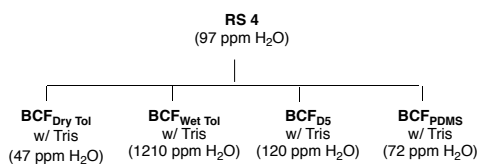

**Table 3**

Figure S2 PR Reaction Flow Chart – different numbers represent different stock solutions where different letters designate different water concentrations of the same (numbered) solution

Table S2 PR reaction times (with error) when [H<sub>2</sub>O]<sub>BCF</sub> in catalyst solution is held constant and [H<sub>2</sub>O]<sub>RS</sub> in reagent solution is varied (Table 1 expanded).

| Solution                         | BCF1 | RS1a | RS1b | RS1c | RS1d | RS1e |
|----------------------------------|------|------|------|------|------|------|
| [H <sub>2</sub> O] (ppm)         | 81   | 54   | 54   | 80   | 280  | 316  |
| KF                               | 76   | 57   | 69   | 85   | 264  | 293  |
|                                  | 85   | 56   | 68   | 90   | 284  | 256  |
| Average [H <sub>2</sub> O] (ppm) | 81   | 56   | 64   | 85   | 276  | 289  |
| Error (ppm)                      | 3    | 1    | 5    | 3    | 6    | 17   |
| PR Reaction Time (s)             | N/A  | 28.4 | 29.5 | 28.2 | 31.3 | 32.7 |
|                                  | N/A  | 31.7 | 30.2 | 30.8 | 30.2 | 32.4 |
|                                  | N/A  | 29.9 | 31.2 | 34.6 | 34.6 | 34.1 |
| Average time (s)                 | N/A  | 30.0 | 30.3 | 31.2 | 32.0 | 33.1 |
| Error (s)                        | N/A  | 1.0  | 0.5  | 1.9  | 1.3  | 0.5  |

Table S3 PR induction and reaction times when the  $[H_2O]_{RS}$  in a model reagent solution is held constant and the  $[H_2O]_{BCF}$  in the catalyst solution (Sigma-Aldrich  $B(C_6F_5)_3$ ) varies (Table 2 expanded).

| <b>Solution</b>                  | <b>RS2</b> | <b>BCF2a</b> | <b>BCF2b</b> | <b>BCF 2c</b> | <b>BCF 2d</b> |
|----------------------------------|------------|--------------|--------------|---------------|---------------|
| [H <sub>2</sub> O] (ppm)         | 79         | 112          | 567          | 687           | 1426          |
| KF readings                      | 105        | 103          | 554          | 648           | 1523          |
|                                  | 80         | 120          | 582          | 642           | 1491          |
| Average [H <sub>2</sub> O] (ppm) | 88         | 112          | 568          | 659           | 1480          |
| Error (ppm)                      | 8          | 5            | 8            | 14            | 29            |
| PR Induction Time (s)            | -          | 0            | 9.7          | 11.9          | 43.8          |
|                                  | -          | 0            | 10.8         | 11.9          | 38.5          |
|                                  | -          | 0            | 11.0         | 12.5          | 39.8          |
| Average time (s)                 | -          | 0            | 11.0         | 12.1          | 40.7          |
| Error (s)                        | -          | 0            | 0.4          | 0.2           | 1.6           |
| PR Reaction Time (s)             | -          | 19.4         | 25.7         | 24.1          | 27.0          |
|                                  | -          | 16.6         | 22.8         | 25.3          | 27.1          |
|                                  | -          | 18.6         | 28.7         | 27.7          | 23.5          |
| Average time (s)                 | -          | 18.2         | 25.7         | 25.7          | 25.9          |
| Error (s)                        | -          | 0.9          | 1.7          | 1.1           | 1.2           |

Table S4 PR induction and reaction times when the  $[H_2O]_{RS}$  in a model reagent solution is held constant and the  $[H_2O]_{BCF}$  in the catalyst solution (Alfa-Aesar  $B(C_6F_5)_3$ ) varies (Table 2 expanded).

| <b>Solution</b>                  | <b>RS3</b> | <b>BCF3a</b> | <b>BCF3b</b> | <b>BCF 3c</b> | <b>BCF 3d</b> |
|----------------------------------|------------|--------------|--------------|---------------|---------------|
| [H <sub>2</sub> O] (ppm)         | 49         | 209          | 643          | 797           | 855           |
|                                  | 65         | 210          | 630          | 780           | 904           |
|                                  | 58         | 214          | 676          | 804           | 895           |
| Average [H <sub>2</sub> O] (ppm) | 57         | 211          | 649          | 794           | 885           |
| Error (ppm)                      | 5          | 2            | 14           | 7             | 15            |
| PR Induction Time (s)            | N/A        | 5.9          | 17.1         | 24.7          | 34.0          |
|                                  | N/A        | 10.3         | 10.4         | 30.0          | 27.7          |
|                                  | N/A        | 9.7          | 16.9         | 24.3          | 38.5          |
| Average time (s)                 | N/A        | 8.6          | 14.8         | 26.4          | 33.4          |
| Error (s)                        | N/A        | 1.4          | 2.2          | 1.8           | 3.1           |
| PR Reaction Time (s)             | N/A        | 20.2         | 27.2         | 21.6          | 23.0          |
|                                  | N/A        | 23.9         | 20.9         | 27.7          | 25.7          |
|                                  | N/A        | 23.4         | 25.7         | 20.9          | 27.9          |
| Average time (s)                 | N/A        | 22.5         | 24.6         | 23.4          | 25.5          |
| Error (s)                        | N/A        | 1.2          | 1.9          | 2.2           | 1.4           |

Table S5 PR induction and reaction times when  $B(C_6F_5)_3$  solution contains tris(trimethylsiloxy)silane in various solvents (Table 3 expanded).

| <b>Solution/ BCF Solvent</b>     | <b>Reagent</b> | <b>Dry Toluene</b> | <b>Wet Toluene</b> | <b>D<sub>5</sub></b> | <b>PDMS</b> |
|----------------------------------|----------------|--------------------|--------------------|----------------------|-------------|
| [H <sub>2</sub> O] (ppm)         | 110            | 29                 | 1252               | 122                  | 66          |
|                                  | 74             | 26                 | 1185               | 111                  | 76          |
|                                  | 108            | 57                 | 1194               | 128                  | 73          |
| Average [H <sub>2</sub> O] (ppm) | 97             | 47                 | 1210               | 120                  | 72          |
| Error (ppm)                      | 12             | 5                  | 21                 | 5                    | 3           |
| PR Induction Time (s)            | N/A            | 0                  | 77.7               | 0                    | 0           |
|                                  | N/A            | 0                  | 76.6               | 0                    | 0           |
|                                  | N/A            | 0                  | 76.6               | 0                    | 0           |
| Average PR Induction Time (s)    | N/A            | 0                  | 77.0               | 0                    | 0           |
| Error (s)                        | N/A            | N/A                | 0.4                | N/A                  | N/A         |
| PR Reaction Time (s)             | N/A            | 38.8               | 40.0               | 46.0                 | 51.3        |
|                                  | N/A            | 34.4               | 44.5               | 51.3                 | 56.8        |
|                                  | N/A            | 34.0               | 42.0               | 51.1                 | 49.7        |
| Average PR Reaction Time (s)     | N/A            | 35.7               | 42.2               | 49.5                 | 56.6        |
| Error (s)                        | N/A            | 1.5                | 1.3                | 1.7                  | 2.1         |

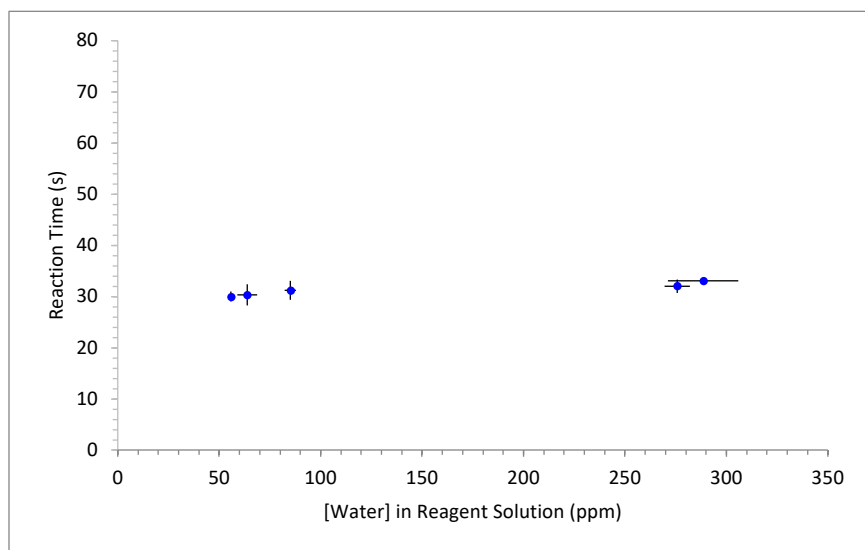

Figure S3 PR overall reaction time as a function of [H<sub>2</sub>O] in reagent solution; [H<sub>2</sub>O] in BCF solution = 80.59 + 2.64 ppm. Note: no induction time, reactions began immediately following catalyst addition (Table S1).

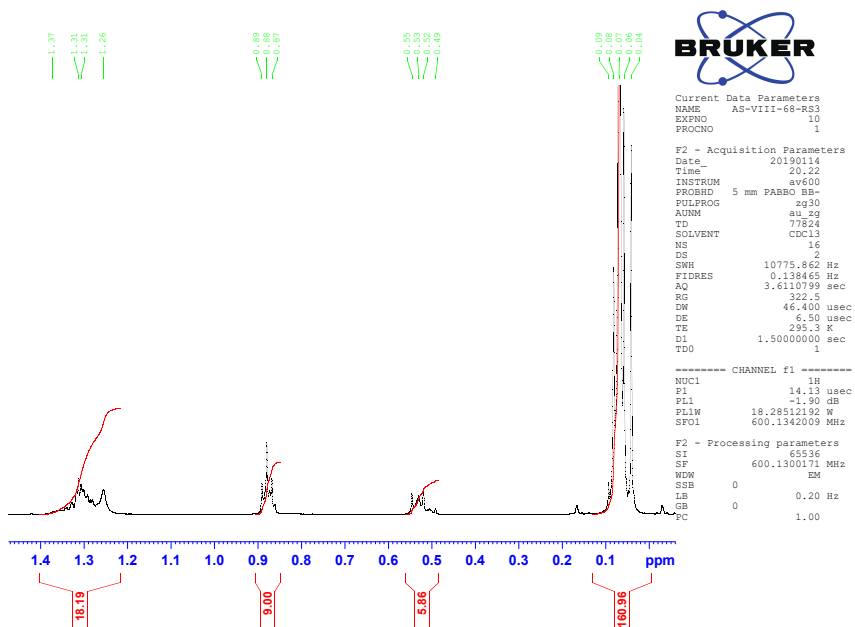

Figure S4 <sup>1</sup>H NMR spectrum of completed model PR reaction.
